# Supplementary material
Source: PubMed Central journal article supplement (PMC5876824)
Supplement: jamaophthalmol-136-365-s001.pdf [file jamaophthalmol-136-365-s001.pdf]

## Supplementary Online Content

Sears CM, Nittala MG, Jayadev C, et al. Comparison of subjective assessment and precise quantitative assessment of lesion distribution in diabetic retinopathy. *JAMA Ophthalmol*. Published online February 22, 2018. doi:10.1001/jamaophthalmol.2018.0070

**eTable 1.** Intragrader Agreement Between Frequency-Based and Surface Area–Based Classification

**eTable 2.** Intergrader Agreement Between Frequency-Based and Surface Area–Based Classification

**eTable 3.** Subjective and Quantitative Agreement Between Frequency-Based and Surface Area–Based Classification

**eTable 4.** Quantitative Agreement Between Frequency-Based and Surface Area–Based Classification

This supplementary material has been provided by the authors to give readers additional information about their work.

eTable 1. Intragrader Agreement Between Frequency-Based and Surface Area–Based Classification

|                 | Surface Area–Based |     |
|-----------------|--------------------|-----|
|                 | PCL                | PPL |
| Frequency-based |                    |     |
| PCL             | 117                | 16  |
| PPL             | 4                  | 24  |

Abbreviations: PCL, predominantly central lesion; PPL, predominantly peripheral lesion.

eTable 2. Intergrader Agreement Between Frequency-Based and Surface Area–Based Classification

|                       | Subjective (Grader 2) |     |                    |     |
|-----------------------|-----------------------|-----|--------------------|-----|
|                       | Frequency-Based       |     | Surface Area–Based |     |
|                       | PCL                   | PPL | PCL                | PPL |
| Subjective (Grader 1) |                       |     |                    |     |
| PCL                   | 133                   | 5   | 120                | 8   |
| PPL                   | 0                     | 23  | 1                  | 32  |

Abbreviations: PCL, predominantly central lesion; PPL, predominantly peripheral lesion

eTable 3. Subjective and Quantitative Agreement Between Frequency-Based and Surface Area–Based Classification

|     | Quantitative    |     |                    |     |
|-----|-----------------|-----|--------------------|-----|
|     | Frequency-Based |     | Surface Area–Based |     |
|     | PCL             | PPL | PCL                | PPL |
| PCL | 133             | 0   | 119                | 2   |
| PPL | 6               | 22  | 15                 | 25  |

Abbreviations: PCL, predominantly central lesion; PPL, predominantly peripheral lesion.

eTable 4. Quantitative Agreement Between Frequency-Based and Surface Area–Based Classification

|                 | Surface Area–Based |     |
|-----------------|--------------------|-----|
|                 | PCL                | PPL |
| Frequency-based |                    |     |
| PCL             | 129                | 10  |
| PPL             | 5                  | 7   |

Abbreviations: PCL, predominantly central lesion; PPL, predominantly peripheral lesion.
